# Supplementary material for: Detecting residual chemical disinfectant using an atomic Co–Nx–C anchored neuronal-like carbon catalyst modified amperometric sensor
Source: Royal Society of Chemistry journal article supplement (doi:10.1039/d1en01111a), 2022-01-01
Supplement: d1en01111a1.pdf [file d1en01111a1.pdf]

**Detecting residual chemical disinfectant using an atomic Co-N<sub>x</sub>-C anchored neuronal-like  
carbon catalyst modified amperometric sensor**

Zehui Li, Guangya Jiang, Yaling Wang, Meijuan Tan, Youpeng Cao, Enze Tian, Lingling Zhang,  
Xiao Chen, Mengze Zhao, Yuheng Jiang, Yuyang Luo, Yuanhao Zheng, Zizhen Ma, Dongbin  
Wang, Wangyang Fu, Kaihui Liu, Cheng Tang, Jingkun Jiang

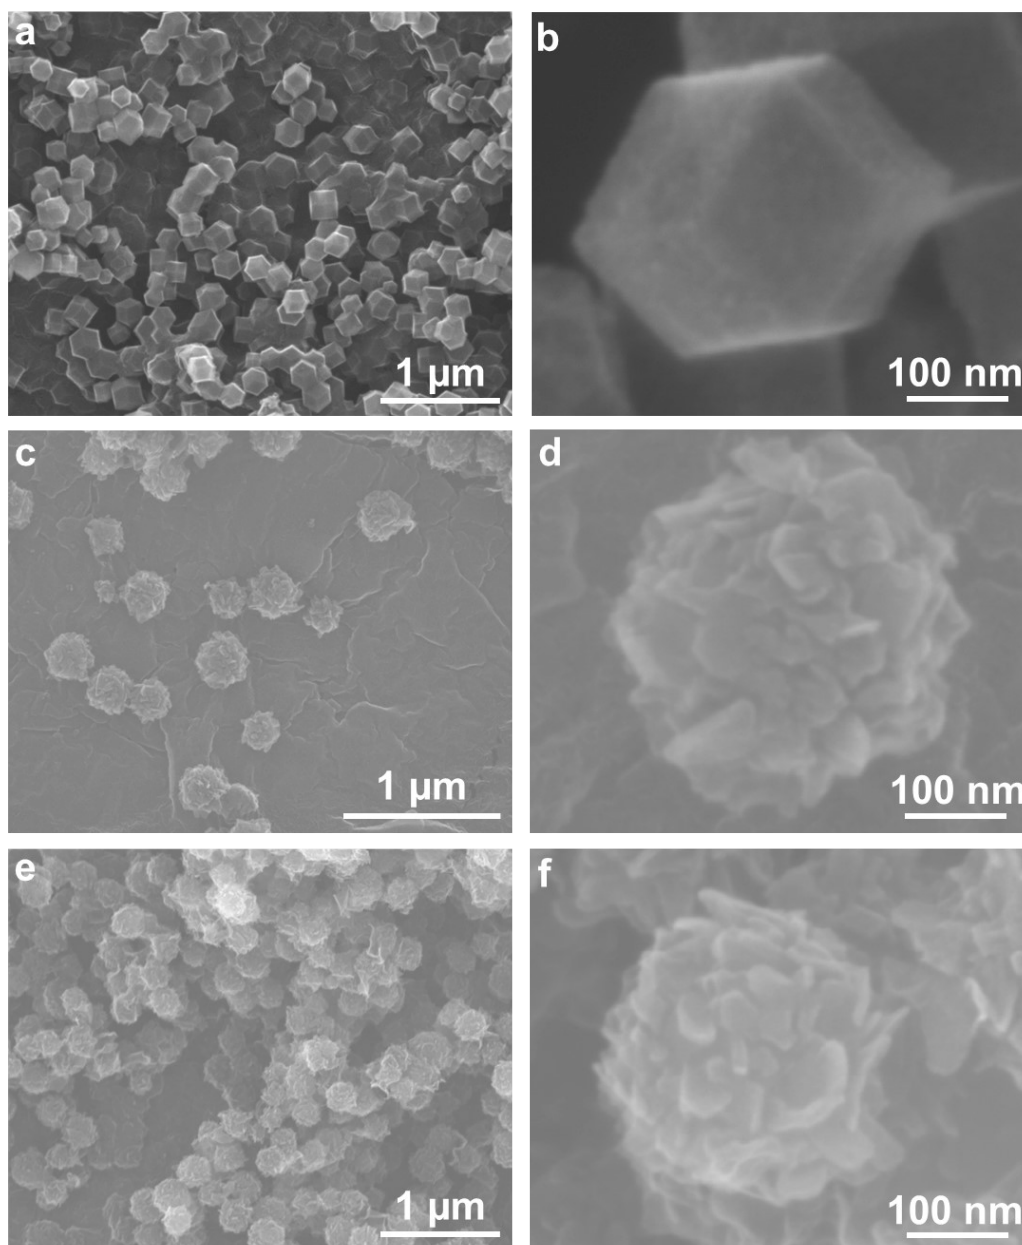

**Figure S1.** SEM images of aggregated (a,b) N/C, (c,d) CoSA-N/C, (e,f) CoSA-N/C@rGO with different magnification.

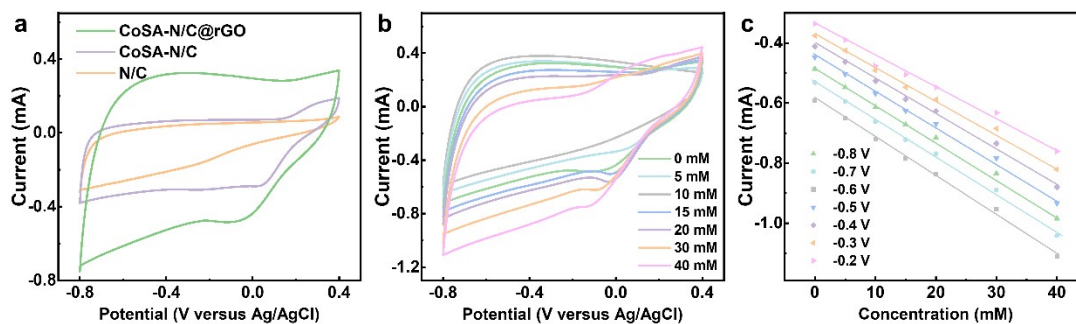

**Figure S2.** CV curves in PB electrolyte solutions (pH=7) with (a) different materials CoSA-N/C@rGO, CoSA-N/C, and N/C at 10 mM; (b) different concentration from 5 mM to 40 mM via CoSA-N/C@rGO and (c) its calibration curve of the amperometric response to the concentration at different potentials.

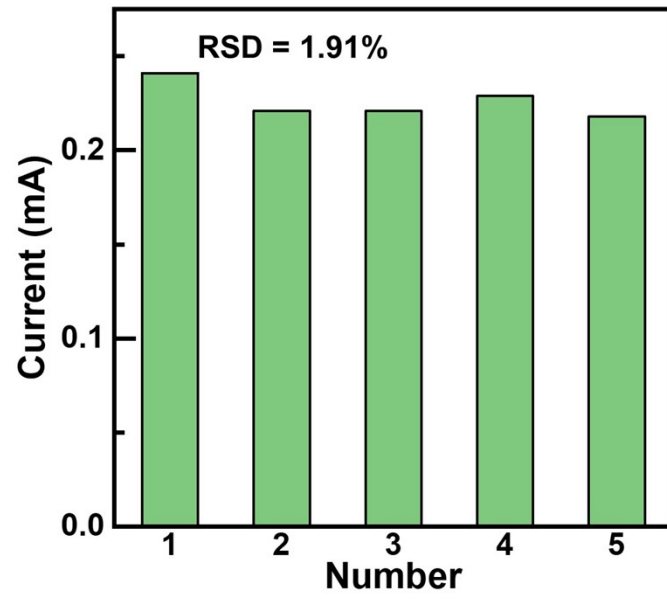

**Figure S3.** Current responses of five Co-N/C@G modified GCE sensors to 5 mM H<sub>2</sub>O<sub>2</sub> at -0.7 V.

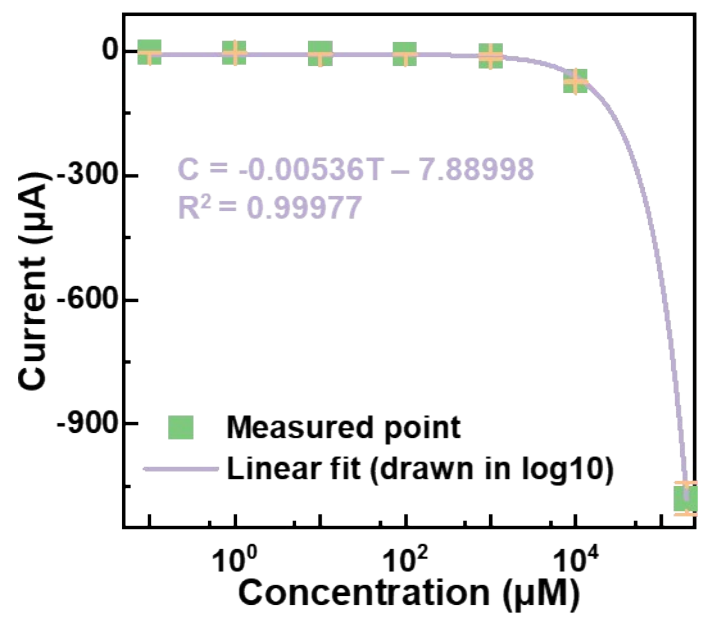

**Figure S4.** Calibration plot of steady-state current of response of the sensor to a range of liquid H<sub>2</sub>O<sub>2</sub> from 100 nM to 1 mM .

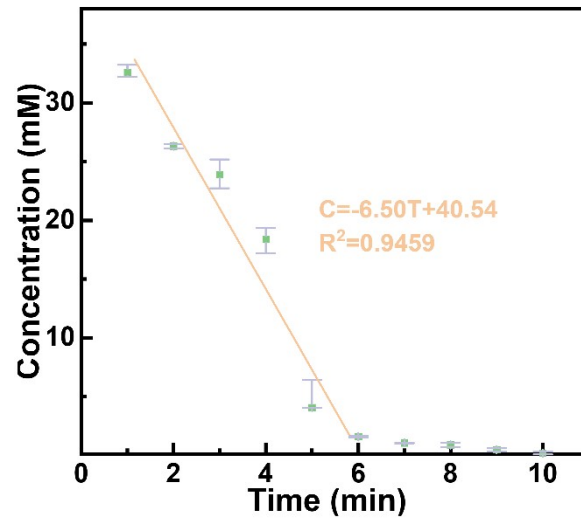

**Figure S5.** Change of residual H<sub>2</sub>O<sub>2</sub> concentration on medical gloves with time.

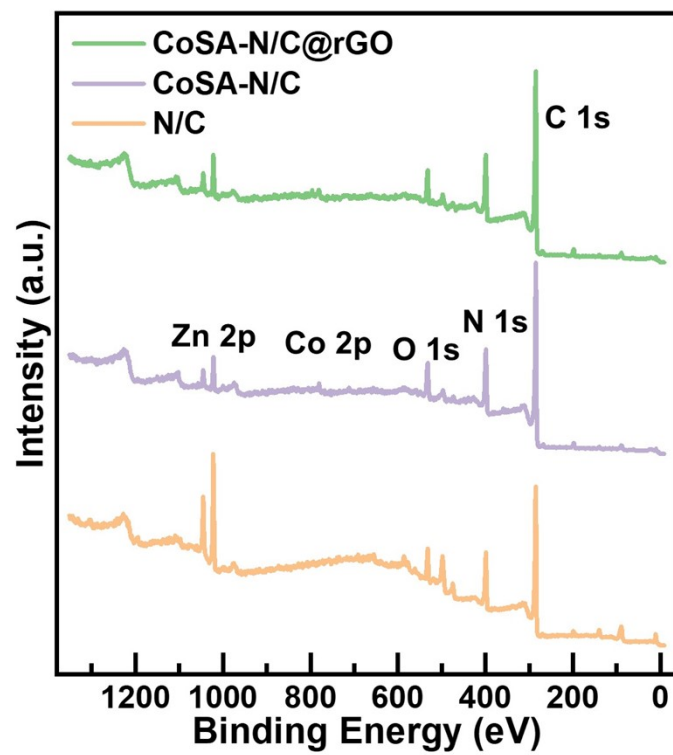

**Figure S6.** XPS survey spectra of CoSA-N/C@rGO, CoSA-N/C and N/C.

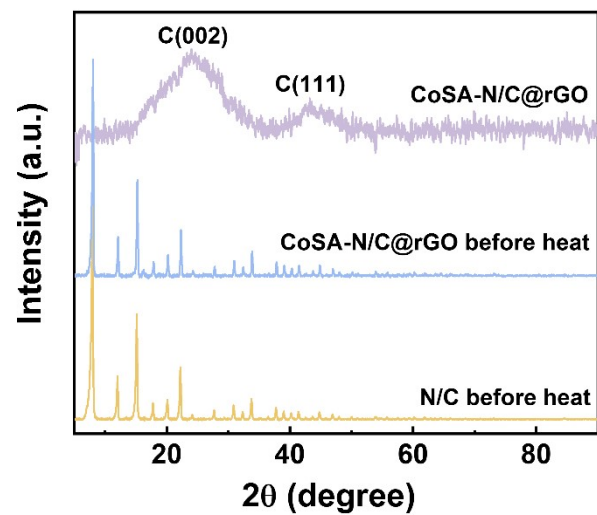

**Figure S7.** XRD pattern of CoSA-N/C@rGO catalyst, N/C and CoSA-N/C@rGO catalyst before pyrolysis.



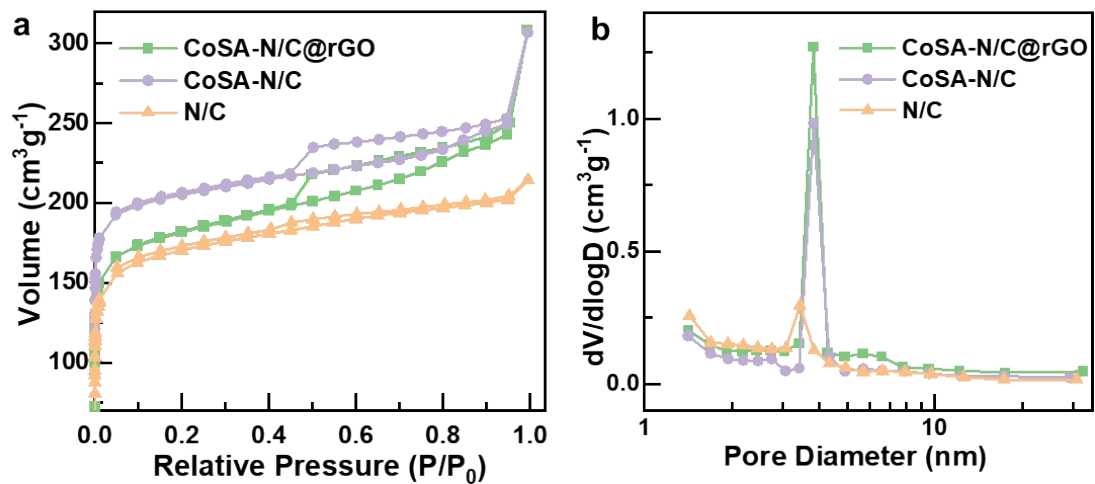

**Figure S8.** (a) Nitrogen adsorption-desorption isotherms and (b) the pore size distribution of N/C,

CoSA-N/C, and CoSA-N/C@rGO.

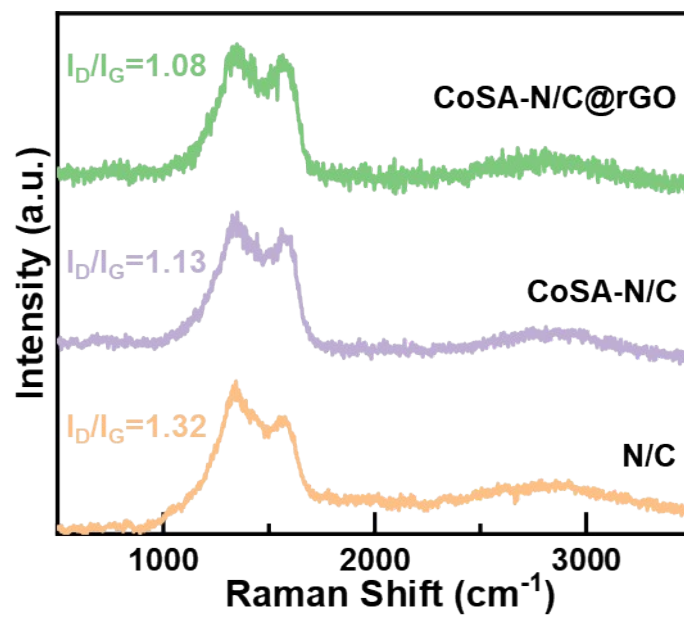

**Figure S9.** The Raman spectra of CoSA-N/C@rGO, CoSA-N/C, and N/C.

**Table S1.** Comparison of H<sub>2</sub>O<sub>2</sub> sensors reported in recent studies.

| Electrode materials                 | Sensitivity<br>( $\mu\text{A mM}^{-1} \text{cm}^{-2}$ ) | Detection<br>limit ( $\mu\text{M}$ ) | Linear range<br>(mM)                  | References                                           |
|-------------------------------------|---------------------------------------------------------|--------------------------------------|---------------------------------------|------------------------------------------------------|
| <b>CoSA-N/C@G</b>                   | <b>743.3</b><br><b>599.2</b>                            | <b>0.25</b>                          | <b>0.00025 ~ 2.5</b><br><b>5 ~ 50</b> | <b>This work</b>                                     |
| Co-N/CNT                            | 568.47                                                  | 0.0324                               | 0.00005 ~ 2.5<br>5 ~ 50               | <i>Small</i> , 2020, 16, 1902860.                    |
| NC@rGO                              | 272                                                     | 3.322                                | 0.005 ~ 20                            | <i>Microchim. Acta</i> , 2018, 185, 501.             |
| Fe-NDs                              | None                                                    | 0.3                                  | 0.001 ~ 0.6                           | <i>Front. Bioeng. Biotechnol.</i> , 2022, 9, 790849. |
| 3D Cu <sub>2</sub> O-GA             | None                                                    | 0.37                                 | 0.001 ~ 1.47                          | <i>Anal. Chem.</i> , 2018, 90, 1983.                 |
| 2D Cu <sub>2</sub> O-rGO-P          | None                                                    | 3.78                                 | 0.005 ~ 10.56                         | <i>Anal. Chem.</i> , 2018, 90, 1983.                 |
| Co-MOF                              | 83.1                                                    | 3.76                                 | 0.005 ~ 9.0                           | <i>Sensor. Actuat. B</i> , 2015, 215, 489.           |
| 3D N-Co-CNT@NG                      | 28.66                                                   | 2                                    | 0.0020 ~ 7.449                        | <i>Biosens. Bioelectron.</i> , 2017, 89, 970.        |
| Fe <sub>3</sub> C/NG                | 133.5                                                   | 35                                   | 0.050 ~ 15                            | <i>Science Bulletin</i> , 2015, 60, 522.             |
| Cu-CoTCPP                           | 168                                                     | 0.24                                 | 0.0005 ~ 18                           | <i>J. Mater. Chem. B</i> , 2015, 3, 9340.            |
| NanoCoPc-Gr                         | 185.7                                                   | 14.6                                 | 0.0167 ~ 1.6                          | <i>Sensor. Actuat. B</i> , 2015, 216, 298-306.       |
| Co <sub>3</sub> O <sub>4</sub> @rGO | None                                                    | 100                                  | 0.0005 ~ 17.5                         | <i>Sci. Rep.</i> , 2017, 7, 43638.                   |
| AuPd@G                              | 186.86                                                  | 1                                    | 0.005 ~ 11.5                          | <i>Biosens. Bioelectron.</i> , 2016, 85, 669.        |
| 1% Mn-N/C                           | 205.7                                                   | 0.036                                | 0.0001 ~ 50                           | <i>Environ. Sci.: Nano</i> , 2018, 5, 1834.          |
| Fe/NOMC                             | 709.63                                                  | 5                                    | 0.008 ~ 23                            | <i>J. Electrochem. Soc.</i> , 2018, 165, H348.       |

**Table S2.** Detection of H<sub>2</sub>O<sub>2</sub> in real samples by Co-N/C@rGO sensor.

| Samples   | Prepared concentration of H <sub>2</sub> O <sub>2</sub> (mM) | Detected value of H <sub>2</sub> O <sub>2</sub> (mM) | RSD (n=3) | Recovery (%) |
|-----------|--------------------------------------------------------------|------------------------------------------------------|-----------|--------------|
| Tap water | 0.05                                                         | 0.0503                                               | 4.30%     | 100.70       |
| Tap water | 0.10                                                         | 0.0982                                               | 2.21%     | 98.19        |

**Table S3.** XPS survey of element composition of CoSA-N/C@rGO.

|                             | Species                     | N/C   | CoSA-N/C | CoSA-N/C@rGO |
|-----------------------------|-----------------------------|-------|----------|--------------|
| Elemental composition (at%) | C 1s                        | 69.68 | 72.63    | 72.72        |
|                             | N 1s                        | 17.78 | 18.34    | 18.66        |
|                             | O 1s                        | 7.09  | 6.88     | 6.30         |
|                             | Co 2p                       | -     | 0.78     | 0.78         |
|                             | Zn 2p                       | 4.70  | 1.38     | 1.54         |
| C (at%)                     | C-C/C=C                     | 46.65 | 46.76    | 45.03        |
|                             | C-O-C                       | 2.24  | 3.07     | 3.82         |
|                             | C=O                         | 6.99  | 8.18     | 9.22         |
|                             | C-N                         | 13.79 | 14.62    | 14.66        |
| N (at%)                     | Pyridinic N                 | 11.29 | 7.51     | 9.78         |
|                             | Co-N <sub>x</sub>           | -     | 2.43     | 2.19         |
|                             | Pyrrolic N                  | 5.18  | 5.11     | 4.70         |
|                             | Quaternary N                | 1.05  | 2.07     | 1.48         |
|                             | Oxidized N                  | 0.27  | 0.77     | 0.46         |
|                             | Chemisorbed N               | 0.00  | 0.46     | 0.05         |
| Co (at%)                    | Co 2p <sub>3/2</sub>        | -     | 0.34     | 0.40         |
|                             | Co 2p <sub>3/2</sub> , sat. | -     | 0.08     | 0.06         |
|                             | Co 2p <sub>1/2</sub>        | -     | 0.17     | 0.21         |
|                             | Co 2p <sub>1/2</sub> , sat. | -     | 0.19     | 0.11         |

**Table S4.** The comparison of porosity parameters of the catalysts.

| Materials    | Porosity parameter                                           |                                                             |                                                    |                                      |                           |
|--------------|--------------------------------------------------------------|-------------------------------------------------------------|----------------------------------------------------|--------------------------------------|---------------------------|
|              | $S_{\text{BET}}^{\text{a}}$<br>( $\text{m}^2\text{g}^{-1}$ ) | $V_{\text{t}}^{\text{b}}$<br>( $\text{cm}^3\text{g}^{-1}$ ) | $V_{\text{mic}}$<br>( $\text{cm}^3\text{g}^{-1}$ ) | $V_{\text{mic}}/V_{\text{t}}$<br>(%) | Average pore size<br>(nm) |
| N/C          | 623                                                          | 0.33                                                        | 0.23                                               | 69.84                                | 2.13                      |
| CoSA-N/C     | 790                                                          | 0.47                                                        | 0.29                                               | 61.09                                | 2.41                      |
| CoSA-N/C@rGO | 670                                                          | 0.48                                                        | 0.24                                               | 49.87                                | 2.85                      |
